# Supplementary material
Source: PubMed Central journal article supplement (PMC3443262)
Supplement: NIHMS392597-supplement-1.pdf [file NIHMS392597-supplement-1.pdf]

# **The structure of purified kinetochores reveals multiple microtubule attachment sites**

**Shane Gonen<sup>1,2,6</sup>, Bungo Akiyoshi<sup>2,3,5,6</sup>, Matthew G. Iadanza<sup>1,4,6</sup>, Dan Shi<sup>4</sup>, Nicole  
Duggan<sup>2</sup>, Sue Biggins<sup>2,S</sup> and Tamir Gonen<sup>1,4,S</sup>**

## **1. Supplementary Figures and Movies**

Supplementary Figure 1. Additional images of Dsn1-Flag material purified from WT, *dad1-1* and *ndc80-1* yeast strains.

Supplementary Figure 2: Kinetochores are enriched on microtubules.

## **2. Supplementary Tables**

Supplementary Table 1. Average kinetochore particle measurements.

Supplementary Table 2. Average measurements of small particles laterally bound to microtubules.

Supplementary Table 3. Quantification of WT and mutant particles bound to microtubules.

Supplementary Table 4. Yeast strains used in this study.

## **3. Supplementary Movies**

Three-dimensional tomographic reconstructions of two representative kinetochore complexes bound to microtubules.

## 1. Supplementary Figures and Movies

Wild type particles

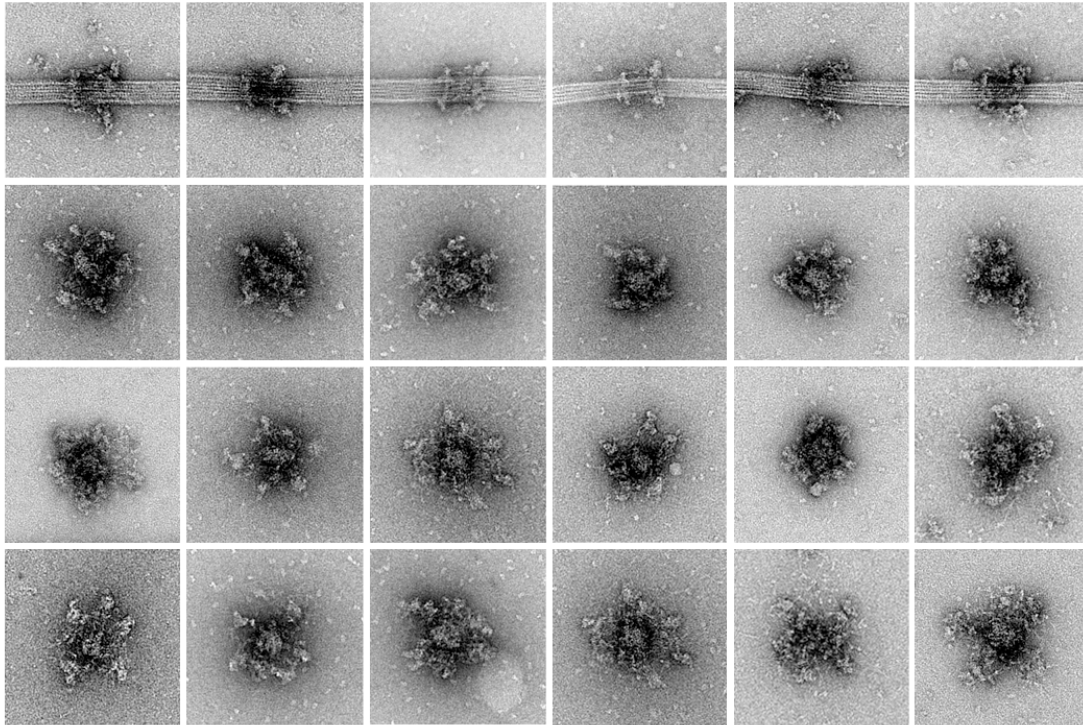

*dad-1* mutant particles

*dad-1* on microtubules

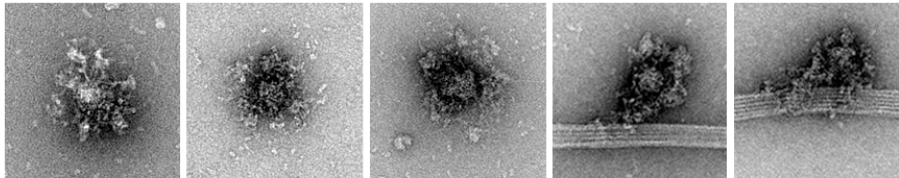

*ndc80-1* mutant particles

*ndc80-1* on microtubules

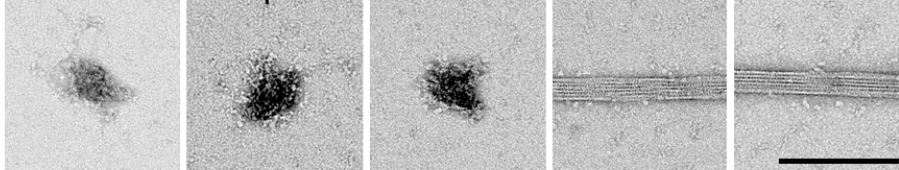

**Supplementary Figure 1. Additional images of Dsn1-Flag material purified from WT, *dad1-1* and *ndc80-1* yeast strains.** Representative negative stain images of Dsn1-His-Flag eluates from WT (SBY8253), *dad1-1* (SBY8460) and *ndc80-1* (SBY8362) strains. Scale bar 200 nm.

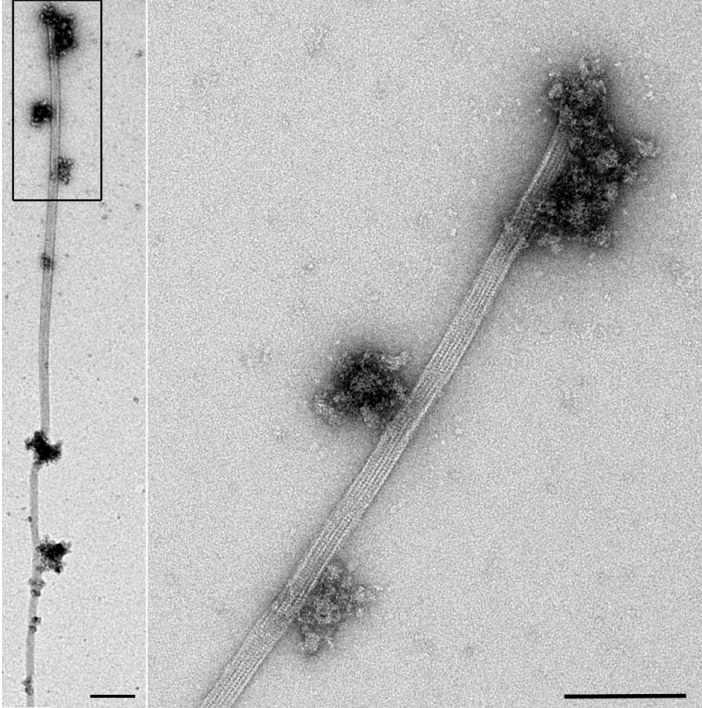

**Supplementary Figure 2: Kinetochores are enriched on microtubules.** An image of a microtubule after incubation with purified kinetochore particles. The kinetochores are enriched on the microtubule relative to the rest of the grid despite being diluted by the incubation with the microtubules. Scale bar 200 nm.

**Supplementary Table 1. Average kinetochore particle measurements.**

|                           | end to end<br>(nm) | central hub<br>(nm) | globular domains<br>(nm) <sup>a</sup> | Number of<br>globular domains |
|---------------------------|--------------------|---------------------|---------------------------------------|-------------------------------|
| Average                   | 126                | 37                  | 21                                    | N/A                           |
| standard deviation        | 13                 | 3                   | 2                                     | N/A                           |
| Numbers of data<br>points | 88                 | 72                  | 97                                    | 79                            |
| max                       | 150                | 44                  | 28                                    | 7                             |
| min                       | 100                | 30                  | 17                                    | 5                             |

<sup>a</sup>The globular domains generally showed varied morphologies rendering accurate quantification impossible. The diameters provided here represent the average that was calculated from 97 selected globular domains that showed the most uniform globular structure.

**Supplementary Table 2. Average measurements of small particles laterally bound to microtubules.**

|                        | Diameter of ring (nm) | Length of rod (nm) | Kink position relative to ring (nm) |
|------------------------|-----------------------|--------------------|-------------------------------------|
| Average                | 50                    | 56                 | 25                                  |
| standard deviation     | 3                     | 4                  | 2                                   |
| numbers of data points | 99                    | 128                | 67                                  |
| max                    | 58                    | 65                 | 30                                  |
| min                    | 45                    | 48                 | 20                                  |

**Supplementary Table 3. Quantification of WT and mutant particles bound to microtubules.**

|         | Large particles<br>with ring | Large particles<br>without ring | Total microtubule<br>length ( $\mu\text{m}$ ) analyzed | Total particles/ $\mu\text{m}$<br>microtubule length |
|---------|------------------------------|---------------------------------|--------------------------------------------------------|------------------------------------------------------|
| WT      | 55                           | 355                             | 493.1 (n=200)                                          | 0.68                                                 |
| Ndc80-1 | 0                            | 3                               | 585.5 (n=200)                                          | 0.005                                                |
| Dad1-1  | 0                            | 175                             | 231.6 (n=100)                                          | 0.76                                                 |

**Supplementary Table 4.** Yeast strains used in this study. All strains are isogenic with the W303 background.

| Strain  | Genotype                                                                                                                          |
|---------|-----------------------------------------------------------------------------------------------------------------------------------|
| SBY3    | <i>MATa ura3-1 leu2,3-112 his3-11 trp1-1 ade2-1 LYS2 can1-100 bar1Δ</i>                                                           |
| SBY7441 | <i>MATa ura3-1 leu2,3-112 his3-11 trp1-1 ade2-1 lys2 can1-100 bar1Δ Dsn1-3Flag::KAN</i>                                           |
| SBY7653 | <i>MATa ura3-1 leu2,3-112 his3-11 trp1-1 ade2-1 LYS2 ALK1-Flag::TRP1 can1-100 bar1Δ</i>                                           |
| SBY8253 | <i>MATa ura3-1 leu2,3-112 his3-11 trp1-1 ade2-1 can1-100 LYS2 bar1Δ DSN1-6His-3Flag::URA3</i>                                     |
| SBY8362 | <i>MATa ura3-1 leu2,3-112 his3-11 trp1-1 ade2-1 can1-100 LYS2 bar1Δ DSN1-6His-3Flag::URA3 ndc80-1</i>                             |
| SBY8460 | <i>MATa ura3-1 leu2,3-112 his3-11 trp1-1::256lacO::TRP1 ade2-1 can1-100 LYS2 bar1Δ DSN1-6His-3Flag:URA3 dad1-1::KAN</i>           |
| SBY9047 | <i>MATa ura3-1 leu2,3-112 his3-11 trp1-1::256lacO::TRP1 ade2-1 Dsn1-3Flag::KAN ndc80::NAT:Ndc80-6His:TRP1 can1-100 LYS2 bar1Δ</i> |

**Supplementary Movies: Three-dimensional tomographic reconstructions of two representative kinetochore complexes bound to microtubules.** For each particle we present a sliced view. Kinetochore complexes in pink, microtubule in yellow.
